# Supplementary material for: 90K/Mac-2 BP Is a New Predictive Biomarker of Response to Infliximab Therapy in IBD Patients
Source: MDPI journal article supplement (doi:10.3390/ijms24043955), 2023-02-16
Supplement: s1 [file s1]

## Supplementary Materials

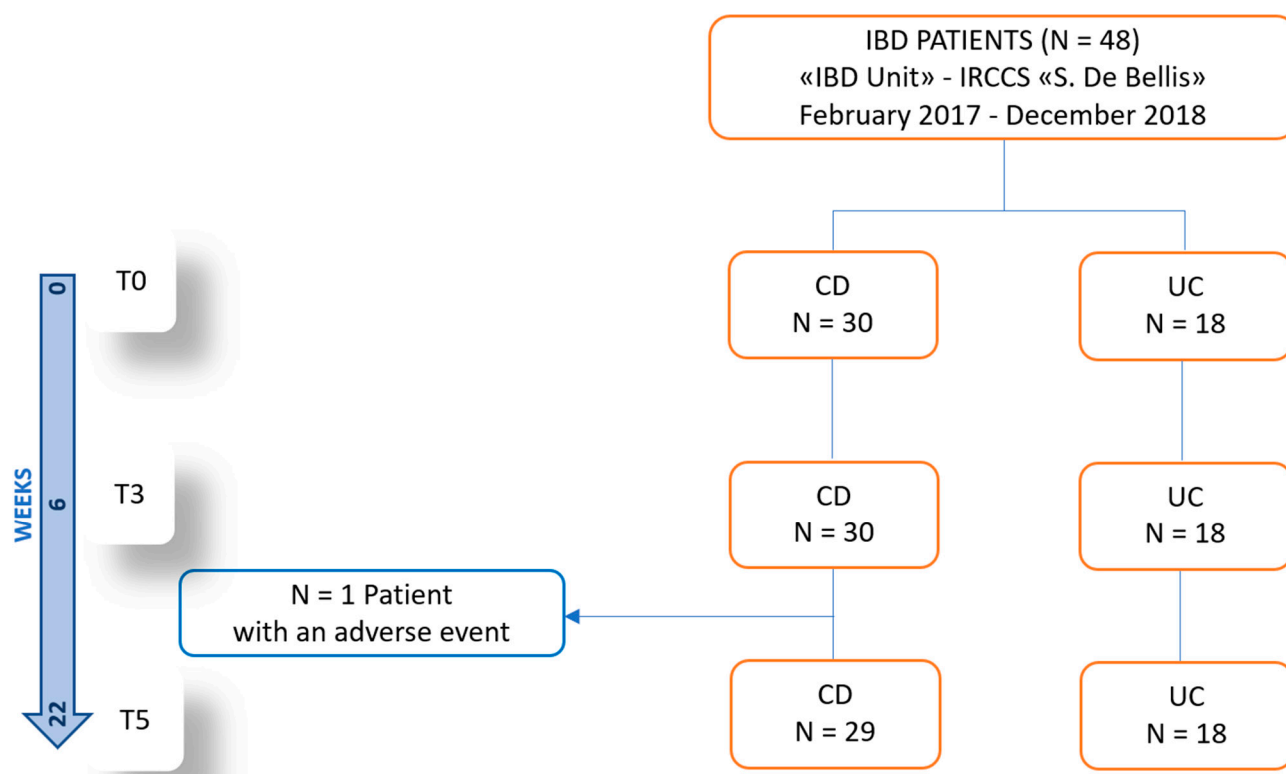

**Figure S1.** Flowchart showing the selection of the patients, the number of CD and UC, and the dropouts. IBD: inflammatory bowel disease; CD: Crohn's disease; UC: ulcerative colitis.

**Table S1.** Comparison between infusion cycles and baseline, and trend for the patients with Crohn's disease (N=29). Statistically significant differences (p-value  $\leq 0.05$ ) are indicated in bold.

| Parameters <sup>†</sup> | Infusion cycles <sup>‡</sup> |              |                            |              |                            |                          |
|-------------------------|------------------------------|--------------|----------------------------|--------------|----------------------------|--------------------------|
|                         | T0<br>(a)                    | T3<br>(b)    | p <sup>#</sup><br>(b vs a) | T5<br>(c)    | p <sup>§</sup><br>(c vs a) | p for Trend <sup>¶</sup> |
| 25OH-Vitamin D (ng/mL)  | 24.08±9.72                   | 23.58±9.30   | 0.84                       | 24.09±9.12   | 0.54                       | 0.68                     |
| 90k (µg/mL)             | 7.78±4.56                    | 8.22±4.27    | 0.25                       | 8.52±4.20    | 0.56                       | 0.63                     |
| CRP (mg/dL)             | 1.55±2.31                    | 0.58±1.34    | <b>0.006</b>               | 0.54±0.89    | <b>0.0002</b>              | <b>0.02</b>              |
| Iron (µg%)              | 62.82±66.67                  | 75.73±76.82  | <b>0.03</b>                | 85.04±47.17  | <b>0.01</b>                | 0.28                     |
| Ferritin (ng/mL)        | 64.95±61.96                  | 36.62±37.37  | <b>0.006</b>               | 78.42±139.48 | 0.42                       | 0.69                     |
| FCP(mg/kg)              | 622.34±303.66                | 240.07±98.10 | <b>&lt;0.0001</b>          | 158.30±90.40 | <b>&lt;0.0001</b>          | <b>&lt;0.0001</b>        |

<sup>†</sup> As Mean and Standard Deviation (M±SD).

<sup>‡</sup> Baseline (T0), prior to the 3<sup>rd</sup> (T3) and 5<sup>th</sup> (T5) infusion.

<sup>§</sup> Wilcoxon signed-rank test; <sup>¶</sup> Test for trend.

CRP: C-reactive protein; FCP: fecal calprotectin.

**Table S2.** Comparison between infusion cycles and baseline, and trend for the patients with ulcerative colitis (N=18). Statistically significant differences (p-value  $\leq 0.05$ ) are indicated in bold.

| Parameters <sup>†</sup> | Infusion cycles <sup>‡</sup> |               |                            |               |                            |                          |
|-------------------------|------------------------------|---------------|----------------------------|---------------|----------------------------|--------------------------|
|                         | T0<br>(a)                    | T3<br>(b)     | p <sup>#</sup><br>(b vs a) | T5<br>(c)     | p <sup>§</sup><br>(c vs a) | p for Trend <sup>¶</sup> |
| 25OH-Vitamin D (ng/mL)  | 26.70±13.39                  | 27.78±15.70   | 0.99                       | 22.46±7.68    | 0.99                       | 0.46                     |
| 90k (µg/mL)             | 7.59±3.36                    | 6.46±3.05     | 0.17                       | 6.22±2.25     | 0.99                       | 0.28                     |
| CRP (mg/dL)             | 2.01±3.93                    | 0.52±0.95     | 0.09                       | 0.38±0.57     | <b>0.02</b>                | 0.09                     |
| Iron (µg%)              | 46.82±27.17                  | 69.65±35.09   | <b>0.02</b>                | 75.42±55.95   | 0.39                       | <b>0.04</b>              |
| Ferritin (ng/mL)        | 57.13±51.53                  | 59.64±71.27   | 0.63                       | 70.40±68.93   | 0.77                       | 0.60                     |
| FCP(mg/kg)              | 598.88±217.95                | 301.63±146.49 | <b>0.004</b>               | 213.53±189.66 | <b>0.001</b>               | <b>&lt;0.0001</b>        |

<sup>†</sup> As Mean and Standard Deviation (M±SD).

<sup>‡</sup> Baseline (T0), prior to the 3<sup>rd</sup> (T3) and 5<sup>th</sup> (T5) infusion.

<sup>§</sup> Wilcoxon signed-rank test; <sup>¶</sup> Test for trend.

CRP: C-reactive protein; FCP: fecal calprotectin.

**Table S3.** Analysis of variance for repeated measures, at Baseline, 3<sup>rd</sup> and 5<sup>th</sup> infusion, for single measured parameters in CD patients with circulating ITLs (No/Yes; Number of patients: No=16; Yes=13). Statistically significant differences (p-value ≤ 0.05) are indicated in bold.

| Parameters <sup>†</sup><br>(CD) | Infusion cycles <sup>‡</sup> |               |              |              | Effects<br>p <sup>§</sup> |                   | Contrasts p <sup>¶</sup><br>vs (a) |                  |
|---------------------------------|------------------------------|---------------|--------------|--------------|---------------------------|-------------------|------------------------------------|------------------|
|                                 | ITLs                         | T0<br>(a)     | T3<br>(b)    | T5<br>(c)    | ITLs                      | Time              | (b)                                | (c)              |
| 90k (µg/mL)                     | --                           | 7.78±4.56     | 7.91±4.34    | 8.32±4.13    | 0.50                      | 0.66              | --                                 | --               |
|                                 | No                           | 8.54±4.58     | 8.21±3.75    | 8.78±4.01    | --                        | --                | 0.65                               | 0.74             |
|                                 | Yes                          | 7.06±4.69     | 7.57±5.27    | 7.76±4.38    | --                        | --                | 0.54                               | 0.40             |
|                                 | <i>p-value</i> <sup>¥</sup>  | 0.38          |              |              |                           |                   |                                    |                  |
| CRP<br>(mg/dL)                  | --                           | 1.55±2.31     | 0.56±1.30    | 0.49±0.86    | 0.37                      | <b>0.007</b>      | --                                 | --               |
|                                 | No                           | 2.03±2.68     | 0.41±0.49    | 0.68±1.11    | --                        | --                | <b>0.001</b>                       | <b>0.02</b>      |
|                                 | Yes                          | 1.06±1.78     | 0.73±1.90    | 0.26±0.25    | --                        | --                | 0.52                               | 0.11             |
|                                 | <i>p-value</i> <sup>¥</sup>  | 0.12          |              |              |                           |                   |                                    |                  |
| FCP<br>(mg/kg)                  | --                           | 622.34±303.66 | 251.59±92.55 | 150.62±90.79 | 0.13                      | <b>&lt;0.0001</b> | --                                 | --               |
|                                 | No                           | 665.00±324.75 | 257.27±88.40 | 199.47±99.24 | --                        | --                | <b>&lt;0.001</b>                   | <b>&lt;0.001</b> |
|                                 | Yes                          | 569.38±294.27 | 235.08±95.60 | 96.15±38.68  | --                        | --                | <b>&lt;0.001</b>                   | <b>&lt;0.001</b> |
|                                 | <i>p-value</i> <sup>¥</sup>  | 0.19          |              |              |                           |                   |                                    |                  |

<sup>†</sup> As mean and Standard Deviation (M±SD).

<sup>‡</sup> Baseline (T0), prior to the 3<sup>rd</sup> (T3) and 5<sup>th</sup> (T5) infusion.

<sup>¥</sup> ITLs at 5<sup>th</sup> (T5) infusion; <sup>§</sup> ANOVA for repeated measures; <sup>¶</sup> Contrasts of marginal linear predictions.

CD: Crohn's disease; ITLs: infliximab trough levels; CRP: C-reactive protein; FCP: fecal calprotectin.

**Table S4.** Analysis of variance for repeated measures, at Baseline, 3<sup>rd</sup> and 5<sup>th</sup> infusion, for single measured parameters in UC patients with circulating ITLs (No/Yes; Number of patients: No=12; Yes=6). Statistically significant differences (p-value ≤ 0.05) are indicated in bold.

| Parameters <sup>†</sup><br>(UC) | Infusion cycles <sup>‡</sup> |               |               |               | Effects<br>p <sup>§</sup> |                   | Contrasts p <sup>¶</sup><br>vs (a) |             |
|---------------------------------|------------------------------|---------------|---------------|---------------|---------------------------|-------------------|------------------------------------|-------------|
|                                 | ITLs                         | T0<br>(a)     | T3<br>(b)     | T5<br>(c)     | ITLs                      | Time              | (b)                                | (c)         |
| 90k (µg/mL)                     | --                           | 7.59±3.36     | 7.64±3.88     | 6.39±2.29     | 0.65                      | 0.34              | --                                 | --          |
|                                 | No                           | 7.60±3.35     | 7.99±4.56     | 6.52±2.57     | --                        | --                | 0.64                               | 0.55        |
|                                 | Yes                          | 7.57±3.69     | 6.94±2.12     | 6.15±1.85     | --                        | --                | 0.58                               | 0.22        |
|                                 | <i>p-value</i> <sup>¥</sup>  | 0.98          |               |               |                           |                   |                                    |             |
| CRP<br>(mg/dL)                  | --                           | 2.01±3.93     | 0.56±0.97     | 0.46±0.60     | 0.73                      | 0.10              | --                                 | --          |
|                                 | No                           | 2.34±4.52     | 0.77±1.19     | 0.60±0.73     | --                        | --                | 0.07                               | <b>0.05</b> |
|                                 | Yes                          | 1.35±2.61     | 0.22±0.25     | 0.28±0.31     | --                        | --                | 0.40                               | 0.40        |
|                                 | <i>p-value</i> <sup>¥</sup>  | 0.45          |               |               |                           |                   |                                    |             |
| FCP<br>(mg/kg)                  | --                           | 598.88±217.95 | 289.23±162.73 | 233.12±192.07 | 0.12                      | <b>&lt;0.0001</b> | --                                 | --          |
|                                 | No                           | 579.73±249.33 | 342.91±173.47 | 310.00±199.09 | --                        | --                | 0.002                              | <0.001      |
|                                 | Yes                          | 634.00±159.31 | 190.83±81.23  | 92.17±43.93   | --                        | --                | <0.001                             | <0.001      |
|                                 | <i>p-value</i> <sup>¥</sup>  | 0.56          |               |               |                           |                   |                                    |             |

<sup>†</sup> As mean and Standard Deviation (M±SD).

<sup>‡</sup> Baseline (T0), prior to the 3<sup>rd</sup> (T3) and 5<sup>th</sup> (T5) infusion.

<sup>¥</sup> ITLs at 5<sup>th</sup> (T5) infusion; <sup>§</sup> ANOVA for repeated measures; <sup>¶</sup> Contrasts of marginal linear predictions.

UC: ulcerative colitis; ITLs: infliximab trough levels; CRP: C-reactive protein; FCP: fecal calprotectin.

**Table S5.** Analysis of variance for repeated measures, at Baseline, 3<sup>rd</sup> and 5<sup>th</sup> infusion, for single measured parameters in the presence of ATIs at T5 (No/Yes) in the patients with Crohn's disease (Number of patients: No=16; Yes=13). Statistically significant differences (p-value ≤ 0.05) are indicated in bold.

| Parameters <sup>†</sup><br>(CD) | Infusion cycles <sup>‡</sup> |               |               |               | Effects<br>p <sup>§</sup> |                   | Contrasts p <sup>¶</sup><br>vs (a) |                  |
|---------------------------------|------------------------------|---------------|---------------|---------------|---------------------------|-------------------|------------------------------------|------------------|
|                                 | ATIs                         | T0<br>(a)     | T3<br>(b)     | T5<br>(c)     | ATIs                      | Time              | (b)                                | (c)              |
| 90k (µg/mL)                     | --                           | 7.78±4.56     | 7.91±4.34     | 8.32±4.13     | <b>0.05</b>               | 0.75              | --                                 | --               |
|                                 | Yes                          | 10.05±5.42    | 9.50±4.81     | 9.45±4.70     | --                        | --                | 0.49                               | 0.46             |
|                                 | No                           | 6.11±2.95     | 6.64±3.75     | 7.40±3.49     | --                        | --                | 0.46                               | 0.08             |
|                                 | <i>p-value</i> <sup>¥</sup>  | <b>0.01</b>   |               |               |                           |                   |                                    |                  |
| CRP (mg/dL)                     | --                           | 1.55±2.31     | 0.56±1.30     | 0.49±0.86     | <b>0.05</b>               | <b>0.004</b>      | --                                 | --               |
|                                 | Yes                          | 2.46±3.10     | 0.88±1.92     | 0.75±1.31     | --                        | --                | <b>0.004</b>                       | <b>0.008</b>     |
|                                 | No                           | 0.90±1.15     | 0.28±0.23     | 0.31±0.22     | --                        | --                | 0.20                               | 0.22             |
|                                 | <i>p-value</i> <sup>¥</sup>  | <b>0.01</b>   |               |               |                           |                   |                                    |                  |
| FCP (mg/kg)                     | --                           | 622.34±303.66 | 251.59±92.55  | 150.62±90.79  | 0.88                      | <b>&lt;0.0001</b> | --                                 | --               |
|                                 | Yes                          | 610.15±312.83 | 252.77±100.72 | 168.69±121.30 | --                        | --                | <b>&lt;0.001</b>                   | <b>&lt;0.001</b> |
|                                 | No                           | 629.67±316.49 | 241.93±84.50  | 136.60±57.60  | --                        | --                | <b>&lt;0.001</b>                   | <b>&lt;0.001</b> |
|                                 | <i>p-value</i> <sup>¥</sup>  | 0.79          |               |               |                           |                   |                                    |                  |

<sup>†</sup> As mean and Standard Deviation (M±SD).

<sup>‡</sup> Baseline (T0), prior to the 3<sup>rd</sup> (T3) and 5<sup>th</sup> (T5) infusion.

<sup>¥</sup> ATIs at 5<sup>th</sup> (T5) infusion; <sup>§</sup> ANOVA for repeated measures; <sup>¶</sup> Contrasts of marginal linear predictions.

CD: Crohn's disease; ATIs: antibodies to infliximab; CRP: C-reactive protein; FCP: fecal calprotectin.

**Table S6.** Analysis of variance for repeated measures, at Baseline, 3<sup>rd</sup> and 5<sup>th</sup> infusion, for single measured parameters in the presence of ATIs at T5 (No/Yes) in the patients with UC (Number of patients: No=13; Yes=5). Statistically significant differences (p-value ≤ 0.05) are indicated in bold.

| Parameters <sup>†</sup><br>(UC) | Infusion cycles <sup>‡</sup> |               |               |               | Effects<br>p <sup>§</sup> |               | Contrasts p <sup>¶</sup><br>vs (a) |                  |
|---------------------------------|------------------------------|---------------|---------------|---------------|---------------------------|---------------|------------------------------------|------------------|
|                                 | ATIs                         | T0<br>(a)     | T3<br>(b)     | T5<br>(c)     | ATIs                      | Time          | (b)                                | (c)              |
| 90k (µg/mL)                     | --                           | 7.59±3.36     | 7.64±3.88     | 6.39±2.29     | 0.09                      | 0.20          | --                                 | --               |
|                                 | Yes                          | 9.03±1.66     | 10.58±5.25    | 7.03±3.36     | --                        | --            | 0.20                               | 0.50             |
|                                 | No                           | 7.04±3.73     | 6.50±2.67     | 6.19±1.99     | --                        | --            | 0.47                               | 0.26             |
|                                 | <i>p-value</i> <sup>¥</sup>  | 0.23          |               |               |                           |               |                                    |                  |
| CRP (mg/dL)                     | --                           | 2.01±3.93     | 0.56±0.97     | 0.46±0.60     | 0.98                      | 0.16          | --                                 | --               |
|                                 | Yes                          | 1.99±2.12     | 0.56±0.37     | 0.67±0.18     | --                        | --            | 0.31                               | 0.44             |
|                                 | No                           | 2.01±4.52     | 0.56±1.12     | 0.42±0.65     | --                        | --            | 0.10                               | 0.06             |
|                                 | <i>p-value</i> <sup>¥</sup>  | 0.99          |               |               |                           |               |                                    |                  |
| FCP (mg/kg)                     | --                           | 598.88±217.95 | 289.23±162.73 | 233.12±192.07 | 0.49                      | <b>0.0001</b> | --                                 | --               |
|                                 | Yes                          | 569.75±207.43 | 314.75±73.47  | 360.00±292.69 | --                        | --            | <b>0.04</b>                        | 0.09             |
|                                 | No                           | 607.85±228.49 | 281.38±183.51 | 194.08±144.05 | --                        | --            | <b>&lt;0.001</b>                   | <b>&lt;0.001</b> |
|                                 | <i>p-value</i> <sup>¥</sup>  | 0.73          |               |               |                           |               |                                    |                  |

<sup>†</sup> As mean and Standard Deviation (M±SD).

<sup>‡</sup> Baseline (T0), prior to the 3<sup>rd</sup> (T3) and 5<sup>th</sup> (T5) infusion.

<sup>¥</sup> ATIs at 5<sup>th</sup> (T5) infusion; <sup>§</sup> ANOVA for repeated measures; <sup>¶</sup> Contrasts of marginal linear predictions.

UC: ulcerative colitis; ATIs: antibodies to infliximab; CRP: C-reactive protein; FCP: fecal calprotectin.
